# Supplementary material for: Das neurourologische Gutachten in der gesetzlichen Unfallversicherung
Source: Springer Nature journal article supplement (doi:10.1007/s00120-023-02039-y), 2023-03-01
Supplement: MOESM2 [file 24091482]

# Gutachten-Fragebogen

**Bitte vollständig ausfüllen und zum  
Untersuchungstermin mitbringen!**

**NEURO-UROLOGIE**

Suppl.1

## 1. Patientendaten

Name: ..... Geburtsdatum: .....

Anschrift: .....

.....

Tel. (Privat) ..... Tel. (Mobil) .....

E-Mail: .....

(vorheriger) Beruf .....

Unfalltag .....

Arbeitgeber zum Unfallzeitpunkt .....

## 2. Allgemeine / Soziale Anamnese:

Körpergröße (cm) ..... Gewicht (kg) .....

Familienstand: ..... Anzahl Ihrer Kinder: .....

Allergien: .....

.....

### Risikofaktoren:

Rauchen Sie?  ja  nein  aufgehört Wenn ja, wie viel am Tag? ..... Seit wann? .....

Alkohol?  ja  nein Wie viel? (z. B. 1 Flasche Bier pro Tag?) .....

# Gutachten-Fragebogen

Bitte vollständig ausfüllen und zum Untersuchungstermin mitbringen!

NEURO-UROLOGIE

Suppl.1

### 3. Medikamente:

Welche Medikamente nehmen Sie ein?

| Medikamentenname: | morgens | mittags | abends | nachts |
|-------------------|---------|---------|--------|--------|
|                   |         |         |        |        |
|                   |         |         |        |        |
|                   |         |         |        |        |
|                   |         |         |        |        |
|                   |         |         |        |        |
|                   |         |         |        |        |
|                   |         |         |        |        |
|                   |         |         |        |        |
|                   |         |         |        |        |

Leiden Sie an Medikamentenunverträglichkeiten?  Ja  Nein

Wenn ja, listen Sie die Unverträglichkeiten bitte auf:

.....  
.....

### 4. Bisherige Operationen / Unfälle:

Datum

Eingriff

|       |       |
|-------|-------|
| ..... | ..... |
| ..... | ..... |
| ..... | ..... |
| ..... | ..... |
| ..... | ..... |

# Gutachten-Fragebogen

**Bitte vollständig ausfüllen und zum Untersuchungstermin mitbringen!**

**NEURO-UROLOGIE**

Suppl.1

**5. Waren Sie vor dem Unfallereignis bereits schon mal in urologischer Behandlung?**

**Wenn ja, wann und bei welchem Facharzt für Urologie waren Sie vorstellig?**

.....  
.....

**6. Vorerkrankungen:**

Haben sie urologische Vorerkrankungen? Wenn ja, welche?

.....  
.....  
.....  
.....

Welche sonstigen Vorerkrankungen / Nebenerkrankungen haben Sie?

.....  
.....  
.....  
.....

**7. Aktuelle urologische Beschwerden:**

Bitte beschreiben Sie Ihre aktuellen Beschwerden im urologischen Fachbereich:

(ggf. auf gesondertem Blatt ergänzen)

Harnblase: .....  
.....  
.....  
.....  
.....  
.....

# Gutachten-Fragebogen

**Bitte vollständig ausfüllen und zum  
Untersuchungstermin mitbringen!**

**NEURO-UROLOGIE**

Suppl.1

Darm: .....  
.....  
.....  
.....

Sexualfunktion: .....  
.....  
.....  
.....

## 8. Behandelnde Ärzte:

**(Bitte Name, Adresse und Telefon- / Faxnummer angeben!)**

Hausarzt: .....  
.....

Urologe: .....  
.....

Gynäkologe: .....  
.....

D-Arzt: .....  
.....

Weitere Ärzte: .....  
.....

# Gutachten-Fragebogen

**Bitte vollständig ausfüllen und zum Untersuchungstermin mitbringen!**

**NEURO-UROLOGIE**

Suppl.1

## 9. Schulausbildung / Berufsausbildung / Studium / Berufstätigkeit:

Welche Schulausbildung haben Sie?

Zeitraum

Schule

|       |       |
|-------|-------|
| ..... | ..... |
| ..... | ..... |
| ..... | ..... |

Welche Berufsausbildung bzw. Lehrausbildung / Studium schloss sich daran an?

Zeitraum

Ausbildungsstätte

|       |       |
|-------|-------|
| ..... | ..... |
| ..... | ..... |
| ..... | ..... |

Welche Berufstätigkeiten haben Sie danach ausgeübt?

Zeitraum

Tätigkeit / Arbeitgeber

|       |       |
|-------|-------|
| ..... | ..... |
| ..... | ..... |
| ..... | ..... |

Welchen Beruf haben Sie zum Unfallzeitpunkt ausgeübt? Bei welcher Firma?

.....

.....

## 10. Rente:

EU - Rentner (Erwerbsunfähigkeit) seit wann: ..... wie hoch: .....

BU - Rentner (Berufsunfähigkeit) seit wann: ..... wie hoch: .....

MdE (Minderung der Erwerbsunfähigkeit) seit wann: ..... wie hoch: .....

## **Gutachten-Fragebogen**

**Bitte vollständig ausfüllen und zum  
Untersuchungstermin mitbringen!**

**NEURO-UROLOGIE**

Suppl.1

### **11. Aktuell arbeitsfähig / arbeitsunfähig:**

unfallabhängig

ja, bis wann: .....

nein, seit wann sind Sie wieder arbeitsfähig: .....

unfallunabhängig

ja, bis wann: .....

nein, seit wann sind Sie wieder arbeitsfähig: .....
